# Supplementary material for: Differences in Static and Kinetic Perimetry Results are Eliminated in Retinal Disease when Psychophysical Procedures are Equated
Source: PubMed Central journal article supplement — Transl Vis Sci Technol. 2018 Oct 1;7(5):22. doi: 10.1167/tvst.7.5.22 (PMC6166892; doi:10.1167/tvst.7.5.22), 2018-10-01
Supplement: tvst-07-05-13_s01.pdf [file tvst-07-05-13_s01.pdf]

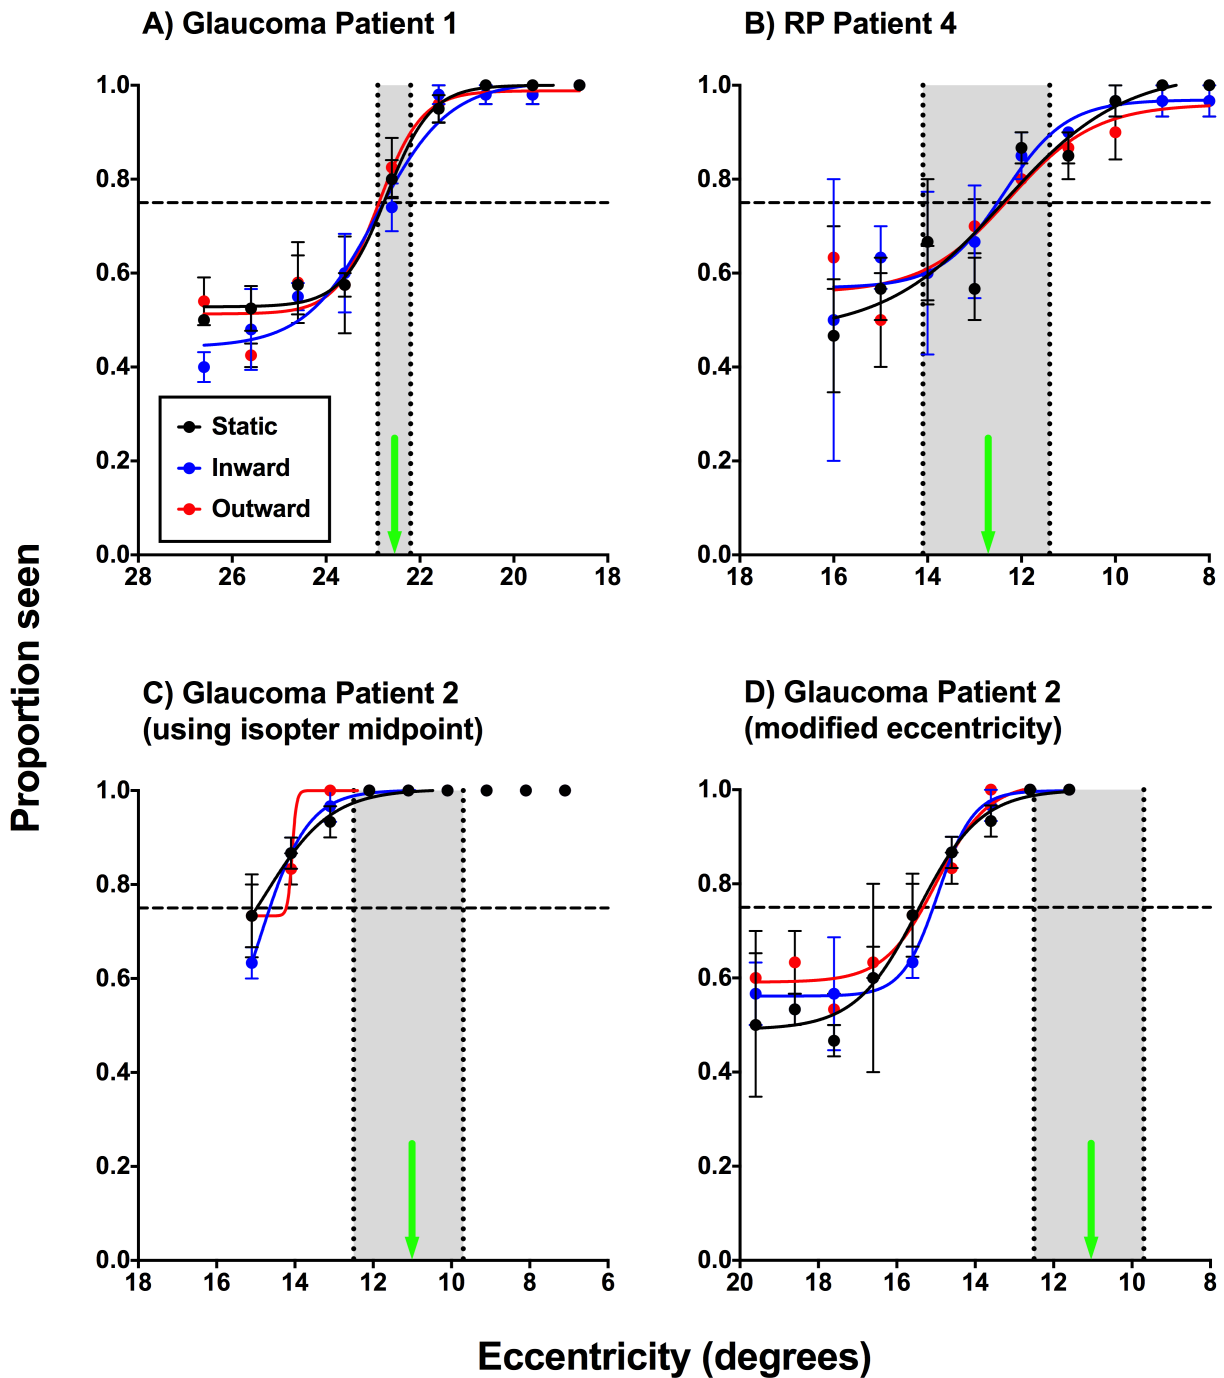

**Supplementary Figure 1:** Psychometric functions showing examples where the isopter midpoint found using two-way MoL coincided with the eccentricity test range for 2IFC testing (A, B). However, in some subjects, the isopter range lay within the region with high proportion seen (1.0), highlighting SKD found using conventional perimetry techniques (C). For these subjects, the test eccentricity range was adjusted to test greater eccentricities to obtain the psychometric function floor (approximately 0.5 proportion seen) (D).
